# Supplementary material for: Design of a peptidic inhibitor that targets the dimer interface of a prototypic galectin
Source: Oncotarget. 2015 Oct 1;6(38):40970–80. doi: 10.18632/oncotarget.5403 (PMC4747383; doi:10.18632/oncotarget.5403)
Supplement: Supplementary file 1 [file oncotarget-06-40970-s001.pdf]

## SUPPLEMENTARY FIGURES AND TABLE

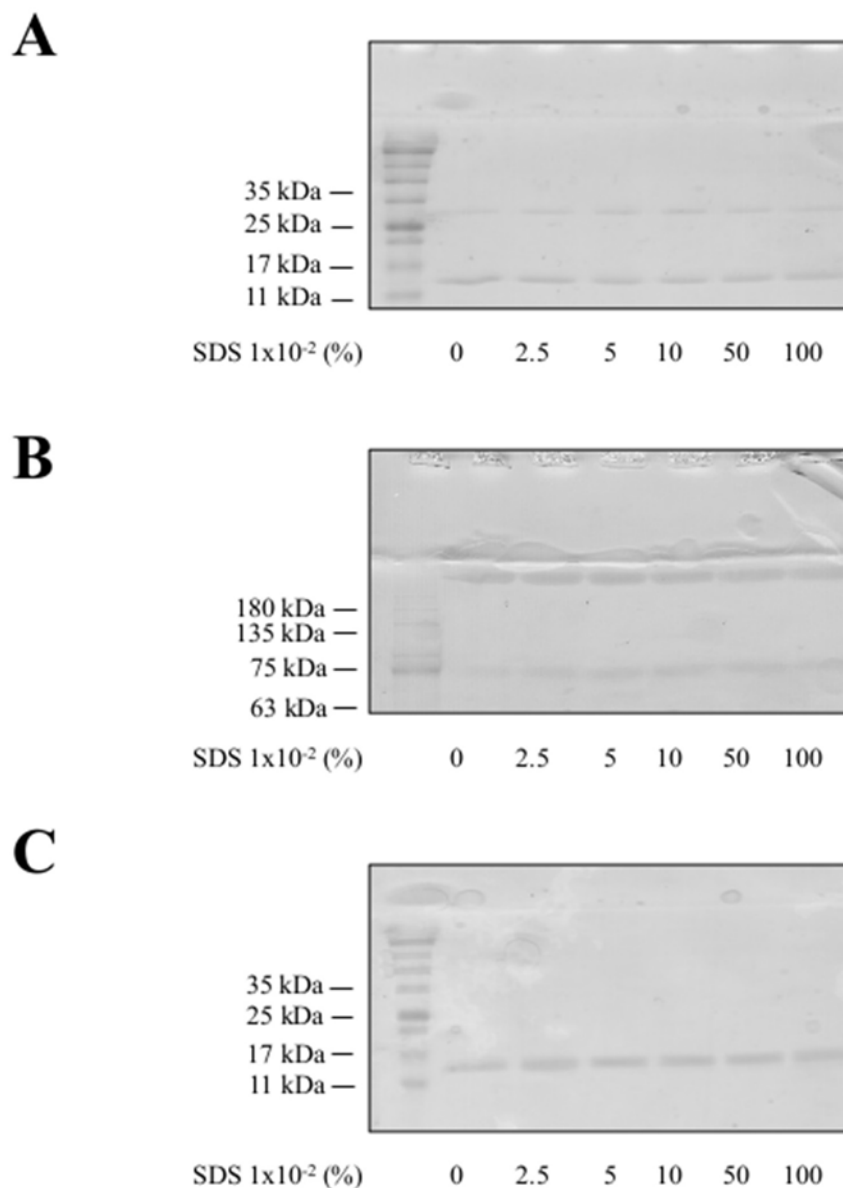

**Supplementary Figure S1: The presence of hGal-7 protein dimer in various (non) denaturing conditions.** The recombinant hGal-7 (1  $\mu$ M) in the presence of increasing concentrations of SDS was migrated in a polyacrylamide gel containing **A.** no SDS and using 0.1% SDS in the migration buffer, **B.** no SDS and without SDS in the migration buffer and **C.** in a polyacrylamide gel containing 0.1% SDS and 0.1% SDS in the migration buffer after heating 5 min at 95°C with  $\beta$ -mercaptoethanol. In all cases, electrophoresis was carried out for 75 min at 150 V before Coomassie Blue staining.

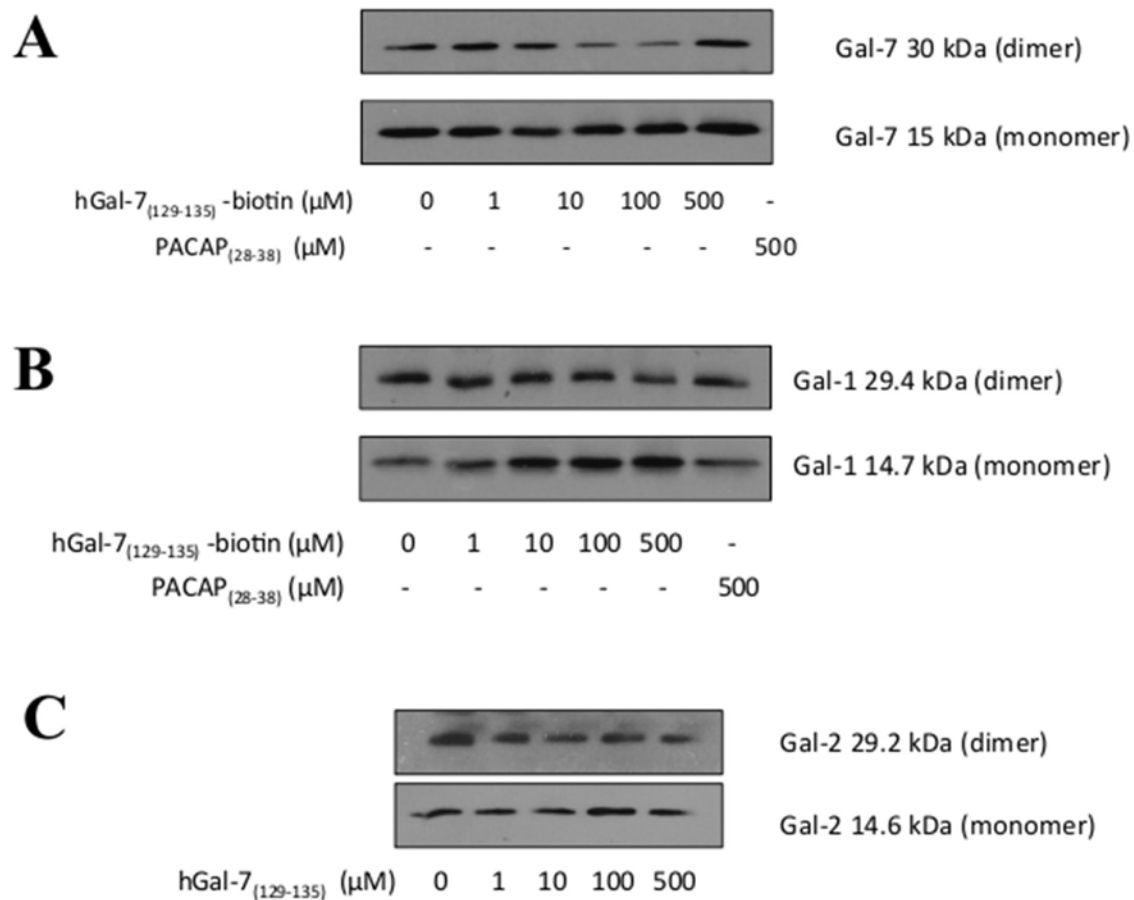

**Supplementary Figure S2: Disruption of hGal-7 dimer by increasing concentrations of hGal-7<sub>129-135</sub>.** **A.** Recombinant gal-7 (0.5 μM) was incubated with increasing concentrations of biotin-labeled hGal-7<sub>129-135</sub> in 20 mM potassium phosphate buffer (pH 7.1) for 60 min at 4°C before Western blot analysis in low SDS-PAGE using an anti-gal-7 antibody. **B.** Similar experiments were carried out using recombinant human **B.** gal-1 and **C.** gal-2. Results are representative of two independent experiments.

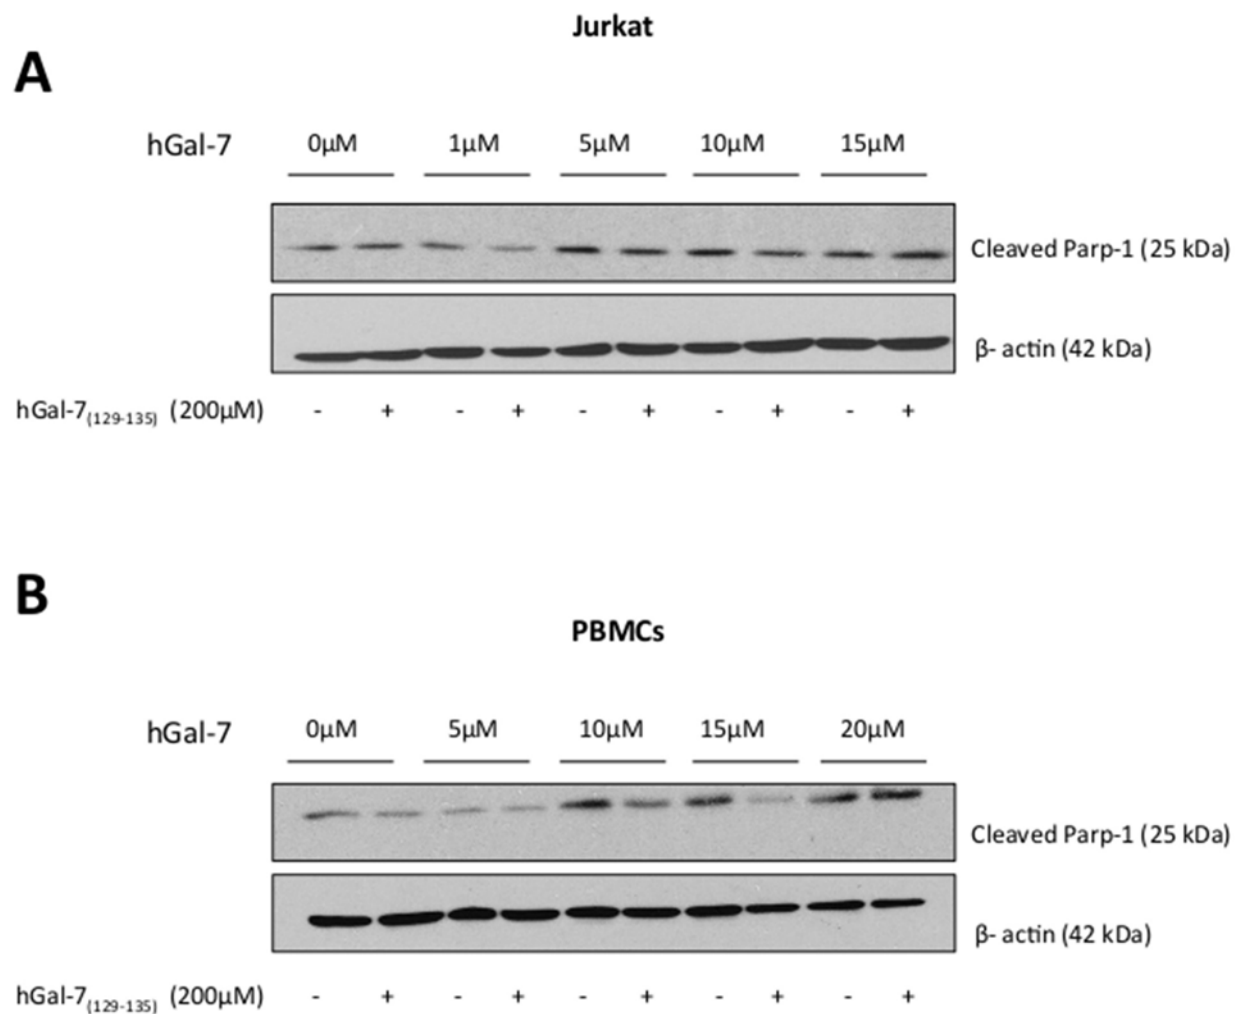

**Supplementary Figure S3: hGal-7<sub>129-135</sub> decreases gal-7-induced apoptosis in Jurkat T cells and PBMCs.** Increasing concentrations of recombinant human gal-7 were pre-incubated with the hGal-7<sub>129-135</sub> (200  $\mu$ M) prior to its addition to **A**. Jurkat T cells or **B**. PBMCs. Apoptosis was measured after 4 h at 37°C in serum-free conditions. Apoptosis by Western blot analysis of parp-1 cleavage.  $\beta$ -actin was used as a loading control. Results are representative of two independent experiments.

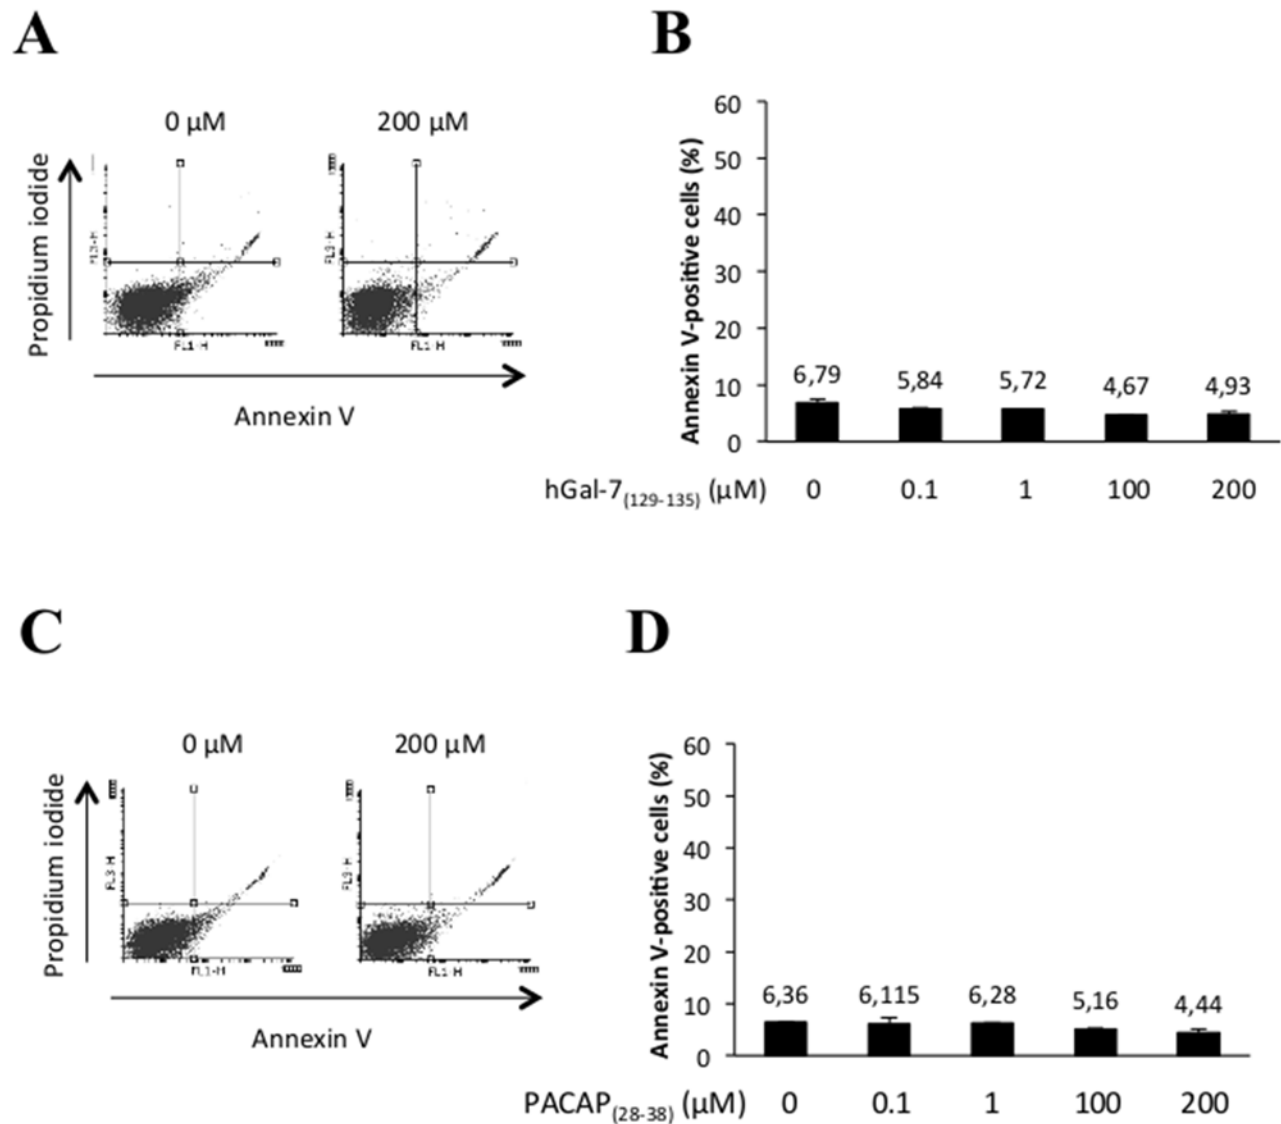

**Supplementary Figure S4: Inability of the control peptide (PACAP) to induce apoptosis on Jurkat T cells.** Jurkat T cells were incubated 4 h at 37°C with increasing concentrations of the control peptide PACAP before two-color flow cytometric analysis. *On the left histograms*, cells in the lower right quadrant are representative of annexin V-positive/PI-negative, or early apoptotic cells. Cells in the upper right quadrant indicate annexin V-positive/PI-positive, or late apoptotic cells. The *right histograms* show the percentages of annexin V-positive Jurkat T cells obtained by adding the percentages of cells found in the lower and upper right quadrants. Results are representative of three independent experiments. Error bars represent standard deviation.

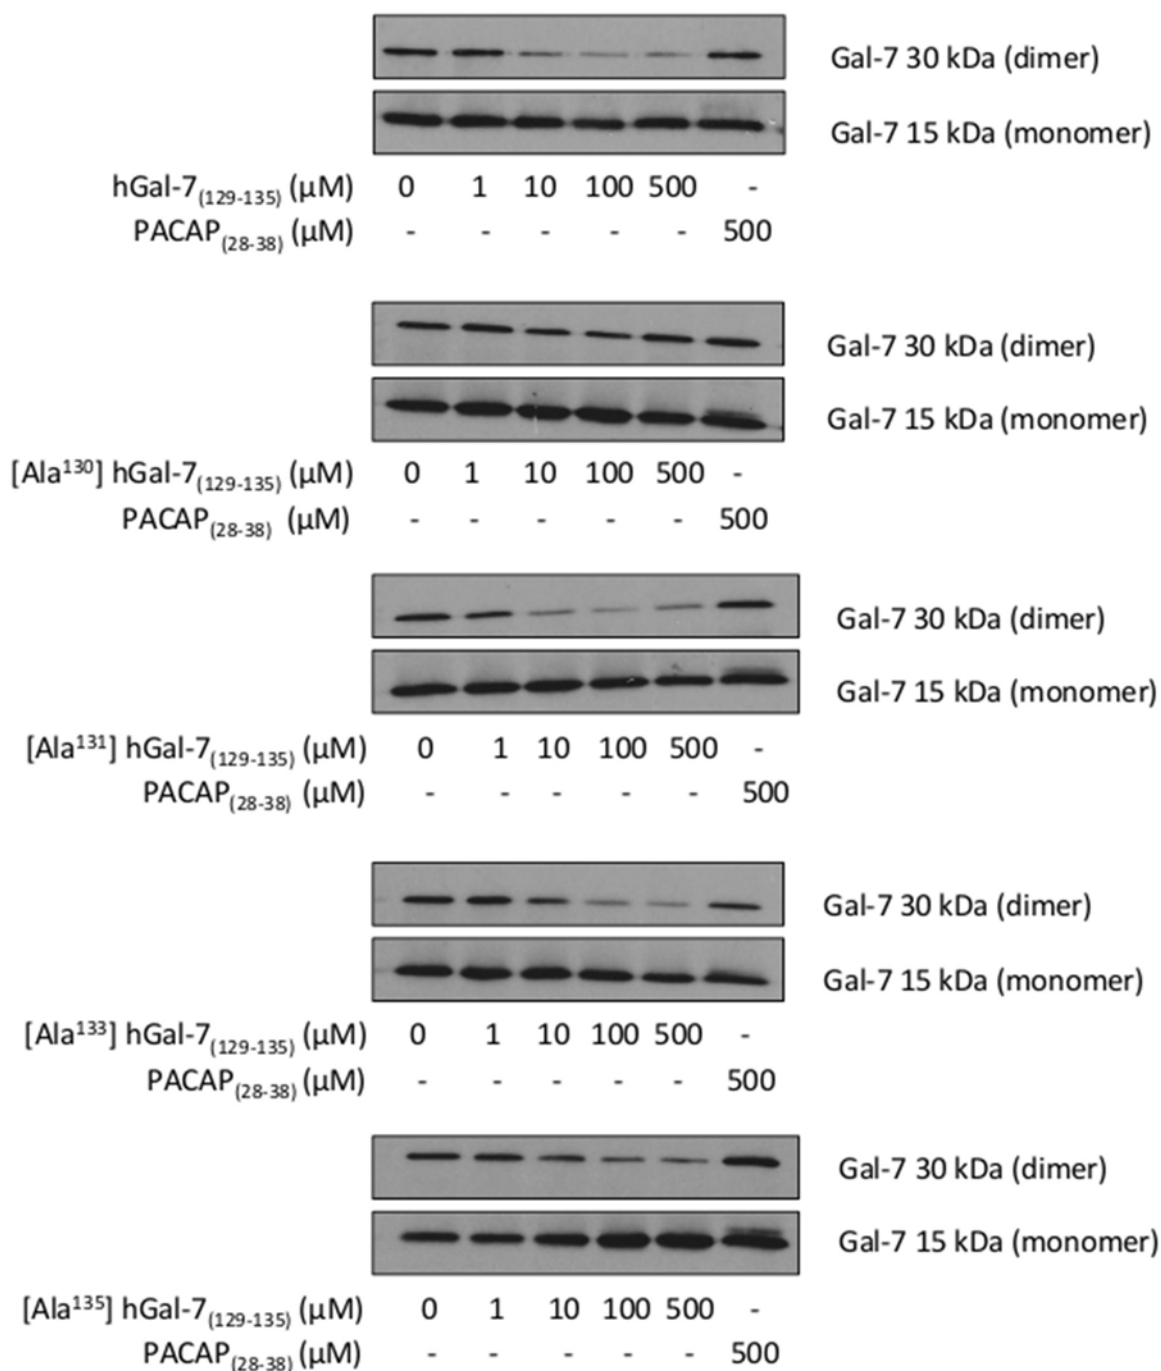

**Supplementary Figure S5: Ala-scan of the hGal-7<sub>129-135</sub> peptide.** Disruption of gal-7 homodimer (0.5 μM) was measured following addition of increasing concentrations of wild-type or mutant hGal-7<sub>129-135</sub>. Monomer/homodimer ratios were measured by Western blot analysis using low SDS-PAGE conditions. Results are representative of three independent experiments.

**Supplementary Table S1: Overview of hGal-7<sub>(129-135)</sub> alanine substitute peptides**

| Peptide name                                      | Peptide sequence | Theoretical MW (g/mol) | Actual MW (g/mol) |
|---------------------------------------------------|------------------|------------------------|-------------------|
| hGal-7 <sub>(129-135)</sub>                       | L-D-S-V-R-I-F    | 849                    | 850.56            |
| [Ala <sup>130</sup> ] hGal-7 <sub>(129-135)</sub> | L-A-S-V-R-I-F    | 805.10                 | 805.01            |
| [Ala <sup>131</sup> ] hGal-7 <sub>(129-135)</sub> | L-D-A-V-R-I-F    | 833.02                 | 833.11            |
| [Ala <sup>133</sup> ] hGal-7 <sub>(129-135)</sub> | L-D-S-V-A-I-F    | 772.92                 | 772.27            |
| [Ala <sup>135</sup> ] hGal-7 <sub>(129-135)</sub> | L-D-S-V-R-I-A    | 763.90                 | 785.61            |
